# Supplementary material for: Redox proteomics of tomato in response to Pseudomonas syringae infection
Source: PubMed Central journal article supplement — Hortic Res. 2015 Sep 16;2:15043–. doi: 10.1038/hortres.2015.43 (PMC4591677; doi:10.1038/hortres.2015.43), 2015-09-16
Supplement: hortres201543-s1.pdf [file hortres201543-s1.pdf]

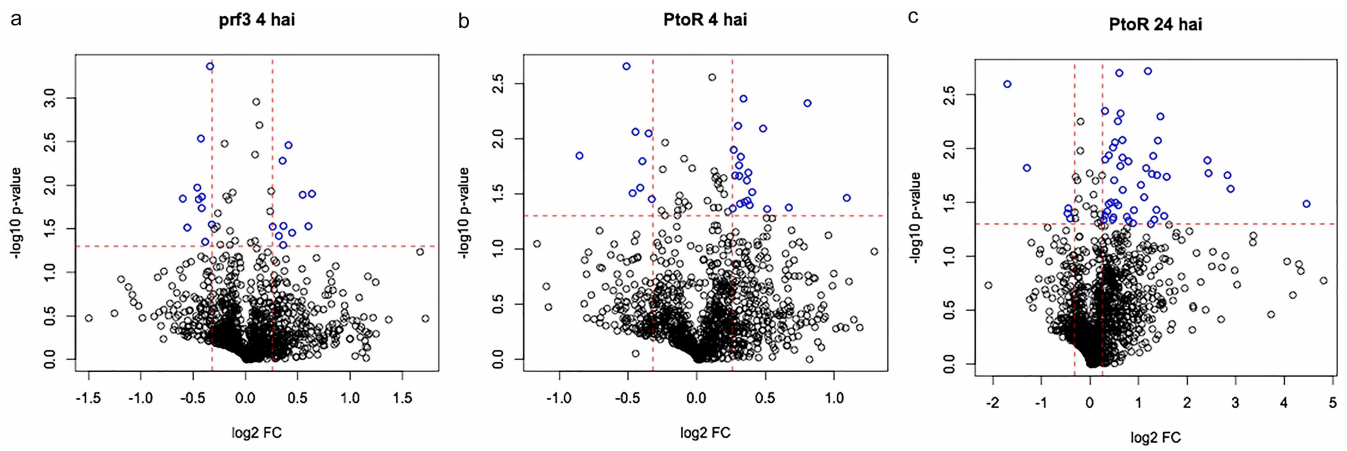

**Supplementary Figure S1.** Criteria used to identify redox proteins under *Pst* infection. A volcano plot of the results of (a) *prf3* 4 hai, (b) PtoR 4 hai, and (c) PtoR 24 hai showing the fold change (*x*-axis) and significance (*p*-value, -log scale on *y*-axis). Each circle represents a peptide identified in at least two biological replicates. The red dashed lines represent the criteria adopted to identify a peptide as being redox-regulated ( $p < 0.05$  and  $FC < 0.8$  or  $FC > 1.2$ ). The blue circles are the peptides determined to be redox responsive.

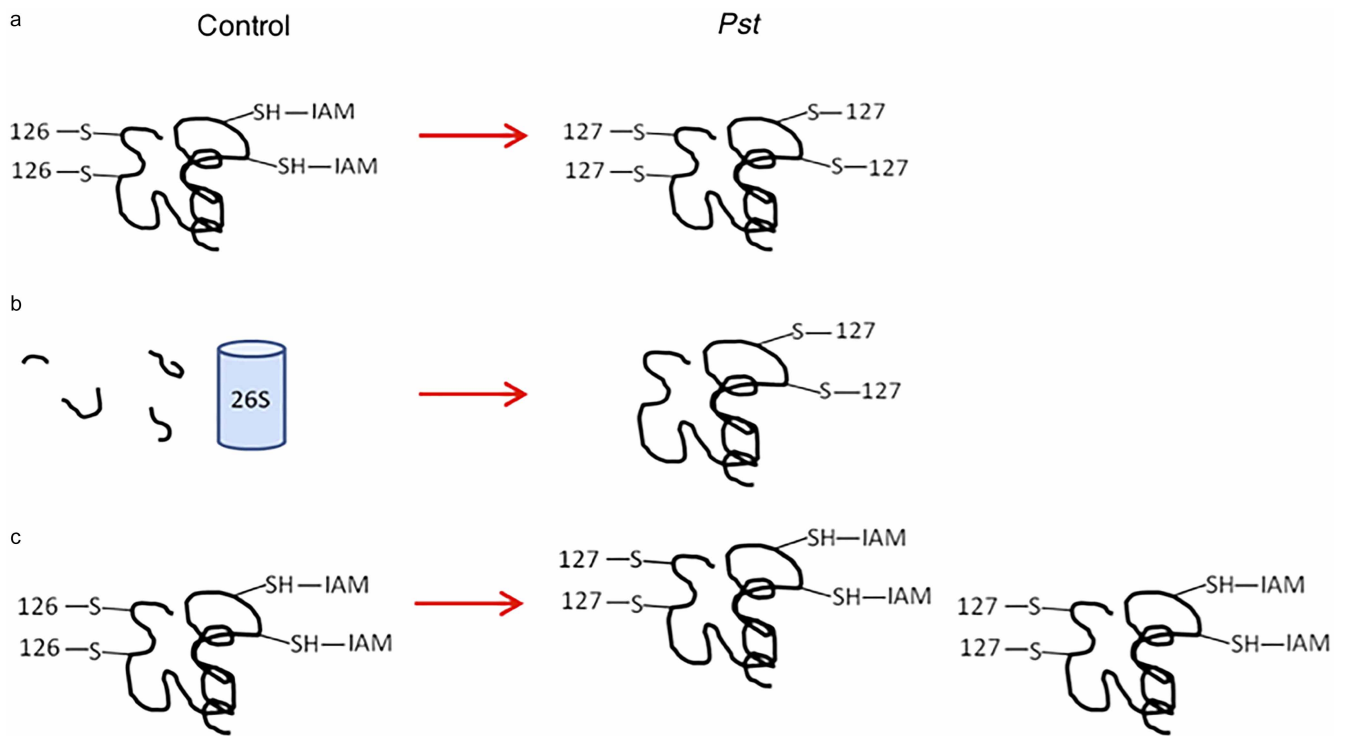

**Supplementary Figure S2.** Effect of protein level changes on the analysis of potential redox proteins. (a) The protein in the control sample is blocked at two cysteines, and the one in the treated sample has twice the amount of tag. (b) Protein degradation could lead to an increase in the treated protein. (c) An increase in treated sample can be due to an increase in the protein amount.
